# Supplementary material for: Integrated Transcriptional Regulatory Network of Quorum Sensing, Replication Control, and SOS Response in Dinoroseobacter shibae
Source: Front Microbiol. 2019 Apr 12;10:803. doi: 10.3389/fmicb.2019.00803 (PMC6473078; doi:10.3389/fmicb.2019.00803)
Supplement: Supplementary file 3 [file Table_3.xlsx]

## Sheet: Sheet2
# Supplementary Table 3: Transcription Factor Binding Sites (TFBS) of D. shibae
LexA binding sites	min. score 82.5%					CtrA TFBS	min score 85 %						CtrA TFBS	min score 82.5 %						CtrA TFBS	min score 80 %
Locus tag	Start	End	Width	Strand	3 oxo C14 HSL inducible (True=T, False=F)	Locus_tag	Start	End	Width	Strand	Sequence	3 oxo C14 HSL inducible (True=T; False=F)	Locus_tag	Start	End	Width	Strand	Sequence	3 oxo C14 HSL inducible (True=T; False=F)	Locus_tag	Start	End	Width	Strand	Sequence	3 oxo C14 HSL inducible (True=T; False=F)
Dshi_0008	229	243	15	+	F	Dshi_0036	130	145	16	+	TTAAGCTTTTCTTAAC	F	Dshi_0036	130	145	16	+	TTAAGCTTTTCTTAAC	F	Dshi_0036	130	145	16	+	TTAAGCTTTTCTTAAC	F
Dshi_0053	71	85	15	+	F	Dshi_0232	357	372	16	+	TTAGCGCACTGTTAAC	F	Dshi_0082	315	330	16	+	GTAAGGATACCTTAAC	T	Dshi_0082	315	330	16	+	GTAAGGATACCTTAAC	T
Dshi_0069	392	406	15	+	F	Dshi_0237	238	253	16	+	TTAATATTTCGTTAAC	F	Dshi_0133	312	327	16	+	TTCTTGGGGCGTTAAC	T	Dshi_0133	312	327	16	+	TTCTTGGGGCGTTAAC	T
Dshi_0102	373	387	15	+	F	Dshi_0819	362	377	16	+	TTAACCGGGCGTTAAC	T	Dshi_0193	418	433	16	+	TGAAGACTGCGTTGAC	F	Dshi_0193	418	433	16	+	TGAAGACTGCGTTGAC	F
Dshi_0114	381	395	15	+	F	Dshi_0854	331	346	16	+	GCAAGGCTCCGTTAAC	T	Dshi_0194	57	72	16	+	TGAAGACTGCGTTGAC	F	Dshi_0194	57	72	16	+	TGAAGACTGCGTTGAC	F
Dshi_0133	352	366	15	+	T	Dshi_0873	367	382	16	+	TTAAAGAAGTGTTAAC	T	Dshi_0232	357	372	16	+	TTAGCGCACTGTTAAC	F	Dshi_0232	357	372	16	+	TTAGCGCACTGTTAAC	F
Dshi_0142	136	150	15	+	F	Dshi_1030	363	378	16	+	TTAAGCCCTCGTTAAC	T	Dshi_0232	368	383	16	+	TTAACACGACGTTAGG	F	Dshi_0232	368	383	16	+	TTAACACGACGTTAGG	F
Dshi_0144	175	189	15	+	F	Dshi_1204	104	119	16	+	TTAACATTACGTTAAC	F	Dshi_0237	238	253	16	+	TTAATATTTCGTTAAC	F	Dshi_0237	238	253	16	+	TTAATATTTCGTTAAC	F
Dshi_0195	382	396	15	+	F	Dshi_1205	341	356	16	+	TTAACGTAATGTTAAG	T	Dshi_0299	394	409	16	+	TTAGCACATGATGAAC	F	Dshi_0299	394	409	16	+	TTAGCACATGATGAAC	F
Dshi_0223	89	103	15	+	F	Dshi_1660	341	356	16	+	TTAGACTATCCTTAAC	F	Dshi_0338	158	173	16	+	TTTGTGTTTGGTTAAC	F	Dshi_0338	158	173	16	+	TTTGTGTTTGGTTAAC	F
Dshi_0269	399	413	15	+	F	Dshi_1748	396	411	16	+	GTAACATGTCGTTAAA	T	Dshi_0391	325	340	16	+	TTTAGCGGACGTTGAC	F	Dshi_0391	325	340	16	+	TTTAGCGGACGTTGAC	F
Dshi_0282	420	434	15	+	F	Dshi_1803	309	324	16	+	TTAAGACCTTGTTTAC	T	Dshi_0412	141	156	16	+	TTCAGAAACCGTTGAC	F	Dshi_0412	141	156	16	+	TTCAGAAACCGTTGAC	F
Dshi_0282	73	87	15	+	F	Dshi_1922	193	208	16	+	TAAACAGTTTGTTAAC	F	Dshi_0430	259	274	16	+	ATTAACCCGCGTTAAC	T	Dshi_0430	259	274	16	+	ATTAACCCGCGTTAAC	T
Dshi_0283	382	396	15	+	F	Dshi_1995	305	320	16	+	TTAACAAAACATTAAC	T	Dshi_0450	162	177	16	+	TGAAAACGTCGTTGAC	F	Dshi_0450	162	177	16	+	TGAAAACGTCGTTGAC	F
Dshi_0289	396	410	15	+	F	Dshi_1995	368	383	16	+	TTTAGCCGCAGTTAAC	T	Dshi_0451	37	52	16	+	TGAAAACGTCGTTGAC	F	Dshi_0451	37	52	16	+	TGAAAACGTCGTTGAC	F
Dshi_0303	397	411	15	+	F	Dshi_2242	365	380	16	+	TTATCCTCAGGTTAAC	F	Dshi_0487	300	315	16	+	GGAGCAGCTGGTTAAC	F	Dshi_0487	300	315	16	+	GGAGCAGCTGGTTAAC	F
Dshi_0304	66	80	15	+	F	Dshi_2336	320	335	16	+	TTAAGGGTCTGTTTAC	T	Dshi_0570	39	54	16	+	GAAAGTCTGCGTTAAC	T	Dshi_0570	39	54	16	+	GAAAGTCTGCGTTAAC	T
Dshi_0328	407	421	15	+	F	Dshi_2388	338	353	16	+	TTAACTTGATGTTAAC	T	Dshi_0585	338	353	16	+	TGTGTATGTCGTTAAC	T	Dshi_0585	338	353	16	+	TGTGTATGTCGTTAAC	T
Dshi_0334	65	79	15	+	F	Dshi_2416	349	364	16	+	TTAACGCGCCCTTAAC	F	Dshi_0602	323	338	16	+	TGAAGCGGTGGTCAAC	F	Dshi_0602	323	338	16	+	TGAAGCGGTGGTCAAC	F
Dshi_0342	377	391	15	+	F	Dshi_2646	225	240	16	+	TTAAGCAGCTGTTAAC	F	Dshi_0613	313	328	16	+	CTAACGTGTCGTTTAC	T	Dshi_0613	313	328	16	+	CTAACGTGTCGTTTAC	T
Dshi_0434	335	349	15	+	F	Dshi_2647	279	294	16	+	TTAACAGCTGCTTAAC	F	Dshi_0675	318	333	16	+	CAAAGAACTGGTTAAC	F	Dshi_0675	318	333	16	+	CAAAGAACTGGTTAAC	F
Dshi_0465	326	340	15	+	F	Dshi_2852	207	222	16	+	TTAATGTTTCGTTAAC	T	Dshi_0763	180	195	16	+	TCAAAATCGGGTTCAC	F	Dshi_0763	180	195	16	+	TCAAAATCGGGTTCAC	F
Dshi_0468	394	408	15	+	F	Dshi_3281	237	252	16	+	TGAAGATTTGGTTAAC	T	Dshi_0819	362	377	16	+	TTAACCGGGCGTTAAC	T	Dshi_0819	362	377	16	+	TTAACCGGGCGTTAAC	T
Dshi_0475	172	186	15	+	F	Dshi_3379	332	347	16	+	TTAGGGCAGCCTTAAC	T	Dshi_0840	243	258	16	+	TGACACCACCGTTAAC	T	Dshi_0840	243	258	16	+	TGACACCACCGTTAAC	T
Dshi_0487	115	129	15	+	F	Dshi_3386	133	148	16	+	TTAGTGTTGTGTTAAC	F	Dshi_0841	88	103	16	+	TAAAATATGGGTTAAC	F	Dshi_0841	88	103	16	+	TAAAATATGGGTTAAC	F
Dshi_0503	411	425	15	+	F	Dshi_3433	343	358	16	+	TTAAGCGGGTATTAAC	T	Dshi_6019	295	310	16	+	GCAACGCTTGGTTAAC	F	Dshi_6019	295	310	16	+	GCAACGCTTGGTTAAC	F
Dshi_0504	198	212	15	+	F	Dshi_3451	172	187	16	+	TTAATAATTATTTAAC	F	Dshi_0852	150	165	16	+	GCAACGCTTGGTTAAC	F	Dshi_0852	150	165	16	+	GCAACGCTTGGTTAAC	F
Dshi_0505	146	160	15	+	F	Dshi_3500	223	238	16	+	TAAAGCTCCTGTTAAC	T	Dshi_0854	331	346	16	+	GCAAGGCTCCGTTAAC	T	Dshi_0854	331	346	16	+	GCAAGGCTCCGTTAAC	T
Dshi_0508	353	367	15	+	F	Dshi_0037	316	331	16	-	GTTAAGAAAAGCTTAA	T	Dshi_0854	342	357	16	+	TTAACATTTCGGTAAG	T	Dshi_0854	342	357	16	+	TTAACATTTCGGTAAG	T
Dshi_0510	304	318	15	+	T	Dshi_0232	367	382	16	-	GTTAACACGACGTTAG	F	Dshi_0870	313	328	16	+	GGAAACAAAGGTTAAC	F	Dshi_0870	313	328	16	+	GGAAACAAAGGTTAAC	F
Dshi_0545	167	181	15	+	F	Dshi_0237	237	252	16	-	GTTAATATTTCGTTAA	F	Dshi_0873	367	382	16	+	TTAAAGAAGTGTTAAC	T	Dshi_0873	367	382	16	+	TTAAAGAAGTGTTAAC	T
Dshi_0559	106	120	15	+	F	Dshi_0627	352	367	16	-	GTGAACGCGCTGGTAA	F	Dshi_0908	167	182	16	+	GCAATACATCGTCAAC	F	Dshi_0908	167	182	16	+	GCAATACATCGTCAAC	F
Dshi_0575	12	26	15	+	T	Dshi_0675	328	343	16	-	GTTAACGCCGGGGTAA	F	Dshi_0932	326	341	16	+	TGAAGCCTTCGTCAAC	F	Dshi_0932	326	341	16	+	TGAAGCCTTCGTCAAC	F
Dshi_0631	267	281	15	+	F	Dshi_0819	361	376	16	-	CTTAACCGGGCGTTAA	T	Dshi_1030	363	378	16	+	TTAAGCCCTCGTTAAC	T	Dshi_1030	363	378	16	+	TTAAGCCCTCGTTAAC	T
Dshi_0697	393	407	15	+	F	Dshi_0854	341	356	16	-	GTTAACATTTCGGTAA	T	Dshi_1127	311	326	16	+	TTACCACCCTGTTTAC	T	Dshi_1127	311	326	16	+	TTACCACCCTGTTTAC	T
Dshi_0701	207	221	15	+	F	Dshi_1204	103	118	16	-	CTTAACATTACGTTAA	F	Dshi_1204	104	119	16	+	TTAACATTACGTTAAC	F	Dshi_1204	104	119	16	+	TTAACATTACGTTAAC	F
Dshi_0877	345	359	15	+	F	Dshi_1205	340	355	16	-	GTTAACGTAATGTTAA	T	Dshi_1205	341	356	16	+	TTAACGTAATGTTAAG	T	Dshi_1205	341	356	16	+	TTAACGTAATGTTAAG	T
Dshi_0880	198	212	15	+	F	Dshi_1644	340	355	16	-	GTTAAGCGTAGCTTAA	T	Dshi_1388	343	358	16	+	ATAACATCTTGTTGAC	F	Dshi_1388	343	358	16	+	ATAACATCTTGTTGAC	F
Dshi_0915	52	66	15	+	F	Dshi_1661	163	178	16	-	GTTAAGGATAGTCTAA	F	Dshi_1486	268	283	16	+	ATAAGTACCCGTTAAG	F	Dshi_1486	268	283	16	+	ATAAGTACCCGTTAAG	F
Dshi_0990	229	243	15	+	F	Dshi_1749	80	95	16	-	TTTAACGACATGTTAC	F	Dshi_1505	347	362	16	+	TTAACAATTGATTAAT	T	Dshi_1505	347	362	16	+	TTAACAATTGATTAAT	T
Dshi_1004	257	271	15	+	F	Dshi_1788	271	286	16	-	GTTAACAAACCATTAA	F	Dshi_1506	325	340	16	+	TTAAGAGGAAGTGAAG	F	Dshi_1506	325	340	16	+	TTAAGAGGAAGTGAAG	F
Dshi_1058	392	406	15	+	F	Dshi_1923	324	339	16	-	GTTAACAAACTGTTTA	T	Dshi_1508	329	344	16	+	GTAACTCGCAATTAAC	T	Dshi_1508	329	344	16	+	GTAACTCGCAATTAAC	T
Dshi_1102	124	138	15	+	T	Dshi_1995	304	319	16	-	GTTAACAAAACATTAA	T	Dshi_1528	369	384	16	+	ATCACCGATGGTTAAC	T	Dshi_1528	369	384	16	+	ATCACCGATGGTTAAC	T
Dshi_1118	410	424	15	+	F	Dshi_2388	337	352	16	-	CTTAACTTGATGTTAA	T	Dshi_1584	342	357	16	+	TTAAGATTCCAGTAAC	T	Dshi_1584	342	357	16	+	TTAAGATTCCAGTAAC	T
Dshi_1127	430	444	15	+	T	Dshi_2401	240	255	16	-	GTTAACGCGCCCTGAA	F	Dshi_1614	345	360	16	+	GCACGAAATGGTTAAC	T	Dshi_1614	345	360	16	+	GCACGAAATGGTTAAC	T
Dshi_1136	259	273	15	+	F	Dshi_2416	348	363	16	-	GTTAACGCGCCCTTAA	F	Dshi_1660	341	356	16	+	TTAGACTATCCTTAAC	F	Dshi_1660	341	356	16	+	TTAGACTATCCTTAAC	F
Dshi_1138	140	154	15	+	T	Dshi_2609	203	218	16	-	GTTAATTTTCGCTTAA	F	Dshi_1715	320	335	16	+	ACAACGCGCCGTTAAC	F	Dshi_1715	320	335	16	+	ACAACGCGCCGTTAAC	F
Dshi_1207	370	384	15	+	F	Dshi_2646	224	239	16	-	GTTAAGCAGCTGTTAA	F	Dshi_1748	396	411	16	+	GTAACATGTCGTTAAA	T	Dshi_1748	396	411	16	+	GTAACATGTCGTTAAA	T
Dshi_1224	368	382	15	+	F	Dshi_2647	278	293	16	-	GTTAACAGCTGCTTAA	F	Dshi_1758	36	51	16	+	TCAAGGTGCAGTTCAC	F	Dshi_1758	36	51	16	+	TCAAGGTGCAGTTCAC	F
Dshi_1337	371	385	15	+	F	Dshi_2828	371	386	16	-	GTTAACGGAACCTGAA	T	Dshi_1767	326	341	16	+	TTATCCAGCCGTTTAC	F	Dshi_1767	326	341	16	+	TTATCCAGCCGTTTAC	F
Dshi_1369	392	406	15	+	F	Dshi_2852	206	221	16	-	GTTAATGTTTCGTTAA	T	Dshi_1785	48	63	16	+	TGAAGAATGCGTTAAT	F	Dshi_1785	48	63	16	+	TGAAGAATGCGTTAAT	F
Dshi_1405	235	249	15	+	F	Dshi_3282	238	253	16	-	GTTAACCAAATCTTCA	F	Dshi_1788	272	287	16	+	TTAACAAACCATTAAG	F	Dshi_1788	272	287	16	+	TTAACAAACCATTAAG	F
Dshi_1443	394	408	15	+	F	Dshi_3452	232	247	16	-	GTTAAATAATTATTAA	F	Dshi_1803	309	324	16	+	TTAAGACCTTGTTTAC	T	Dshi_1803	309	324	16	+	TTAAGACCTTGTTTAC	T
Dshi_1457	360	374	15	+	F	Dshi_3592	125	140	16	-	CTTAACAAACCATTAA	T	Dshi_1805	347	362	16	+	TTGCCAATTGGTTAAC	F	Dshi_1805	347	362	16	+	TTGCCAATTGGTTAAC	F
Dshi_1468	332	346	15	+	F								Dshi_1809	374	389	16	+	TGAGGGAACGGTTAAC	F	Dshi_1809	374	389	16	+	TGAGGGAACGGTTAAC	F
Dshi_1476	108	122	15	+	F								Dshi_1817	40	55	16	+	TTTCAGGACTGTTAAC	F	Dshi_1817	40	55	16	+	TTTCAGGACTGTTAAC	F
Dshi_1476	427	441	15	+	F								Dshi_1818	384	399	16	+	TTTCAGGACTGTTAAC	F	Dshi_1818	384	399	16	+	TTTCAGGACTGTTAAC	F
Dshi_1490	365	379	15	+	F								Dshi_1919	327	342	16	+	TTAACCGGTCGTTCCC	F	Dshi_1919	327	342	16	+	TTAACCGGTCGTTCCC	F
Dshi_1501	385	399	15	+	F								Dshi_1922	193	208	16	+	TAAACAGTTTGTTAAC	F	Dshi_1922	193	208	16	+	TAAACAGTTTGTTAAC	F
Dshi_1509	271	285	15	+	F								Dshi_1923	325	340	16	+	TTAACAAACTGTTTAC	T	Dshi_1923	325	340	16	+	TTAACAAACTGTTTAC	T
Dshi_1529	311	325	15	+	F								Dshi_1924	296	311	16	+	TTATTAGCGTGTTCAC	T	Dshi_1924	296	311	16	+	TTATTAGCGTGTTCAC	T
Dshi_1548	380	394	15	+	F								Dshi_1927	356	371	16	+	TTATGAGAGCGGTAAC	F	Dshi_1927	356	371	16	+	TTATGAGAGCGGTAAC	F
Dshi_1604	171	185	15	+	F								Dshi_1963	222	237	16	+	CTAACGTTGCGGTAAC	F	Dshi_1963	222	237	16	+	CTAACGTTGCGGTAAC	F
Dshi_1625	366	380	15	+	F								Dshi_1976	205	220	16	+	TCCCTGGGCCGTTAAC	F	Dshi_1976	205	220	16	+	TCCCTGGGCCGTTAAC	F
Dshi_1643	338	352	15	+	T								Dshi_1995	305	320	16	+	TTAACAAAACATTAAC	T	Dshi_1995	305	320	16	+	TTAACAAAACATTAAC	T
Dshi_1753	209	223	15	+	F								Dshi_1995	368	383	16	+	TTTAGCCGCAGTTAAC	T	Dshi_1995	368	383	16	+	TTTAGCCGCAGTTAAC	T
Dshi_1765	434	448	15	+	F								Dshi_2095	264	279	16	+	ATCAGGTTGCGTTAAC	F	Dshi_2095	264	279	16	+	ATCAGGTTGCGTTAAC	F
Dshi_1769	379	393	15	+	F								Dshi_2145	291	306	16	+	TTATGTTAGCGATAAC	F	Dshi_2145	291	306	16	+	TTATGTTAGCGATAAC	F
Dshi_1786	31	45	15	+	F								Dshi_2194	340	355	16	+	GTCACGCCCCGTTAAC	T	Dshi_2194	340	355	16	+	GTCACGCCCCGTTAAC	T
Dshi_1803	262	276	15	+	T								Dshi_2210	255	270	16	+	TTTCCGAGGCGTTAAC	T	Dshi_2210	255	270	16	+	TTTCCGAGGCGTTAAC	T
Dshi_1803	273	287	15	+	T								Dshi_2242	365	380	16	+	TTATCCTCAGGTTAAC	F	Dshi_2242	365	380	16	+	TTATCCTCAGGTTAAC	F
Dshi_1803	284	298	15	+	T								Dshi_2247	235	250	16	+	GTAAACGATCATGAAC	F	Dshi_2247	235	250	16	+	GTAAACGATCATGAAC	F
Dshi_1916	419	433	15	+	F								Dshi_2336	320	335	16	+	TTAAGGGTCTGTTTAC	T	Dshi_2336	320	335	16	+	TTAAGGGTCTGTTTAC	T
Dshi_2095	301	315	15	+	F								Dshi_2344	236	251	16	+	TGGGCGGATCGTTAAC	F	Dshi_2344	236	251	16	+	TGGGCGGATCGTTAAC	F
Dshi_2100	380	394	15	+	T								Dshi_2388	338	353	16	+	TTAACTTGATGTTAAC	T	Dshi_2388	338	353	16	+	TTAACTTGATGTTAAC	T
Dshi_2123	362	376	15	+	F								Dshi_2401	241	256	16	+	TTAACGCGCCCTGAAC	F	Dshi_2401	241	256	16	+	TTAACGCGCCCTGAAC	F
Dshi_2147	125	139	15	+	T								Dshi_2416	349	364	16	+	TTAACGCGCCCTTAAC	F	Dshi_2416	349	364	16	+	TTAACGCGCCCTTAAC	F
Dshi_2152	202	216	15	+	F								Dshi_2467	219	234	16	+	TCAAAAAAAGGTTTAC	F	Dshi_2467	219	234	16	+	TCAAAAAAAGGTTTAC	F
Dshi_2156	135	149	15	+	F								Dshi_2468	280	295	16	+	TTACCCTAACGTAAAC	F	Dshi_2468	280	295	16	+	TTACCCTAACGTAAAC	F
Dshi_2169	20	34	15	+	T								Dshi_2515	4	19	16	+	TCAACGGTCTGTGAAC	F	Dshi_2515	4	19	16	+	TCAACGGTCTGTGAAC	F
Dshi_2192	357	371	15	+	F								Dshi_2538	308	323	16	+	ATAAAAGAGCGTTAAT	F	Dshi_2538	308	323	16	+	ATAAAAGAGCGTTAAT	F
Dshi_2233	378	392	15	+	F								Dshi_2539	300	315	16	+	TCAATCCTAGATTAAC	F	Dshi_2539	300	315	16	+	TCAATCCTAGATTAAC	F
Dshi_2245	55	69	15	+	F								Dshi_2646	225	240	16	+	TTAAGCAGCTGTTAAC	F	Dshi_2646	225	240	16	+	TTAAGCAGCTGTTAAC	F
Dshi_2267	185	199	15	+	T								Dshi_2647	279	294	16	+	TTAACAGCTGCTTAAC	F	Dshi_2647	279	294	16	+	TTAACAGCTGCTTAAC	F
Dshi_2297	354	368	15	+	F								Dshi_2656	305	320	16	+	TCAACACAGCGTTTAC	F	Dshi_2656	305	320	16	+	TCAACACAGCGTTTAC	F
Dshi_2306	373	387	15	+	F								Dshi_2664	226	241	16	+	GCACCCGACCGTTAAC	F	Dshi_2664	226	241	16	+	GCACCCGACCGTTAAC	F
Dshi_2364	250	264	15	+	F								Dshi_2676	298	313	16	+	TCAACCTATGGTGAAC	F	Dshi_2676	298	313	16	+	TCAACCTATGGTGAAC	F
Dshi_2375	173	187	15	+	F								Dshi_2740	269	284	16	+	TTTGGAGTTCCTTAAC	T	Dshi_2740	269	284	16	+	TTTGGAGTTCCTTAAC	T
Dshi_2425	393	407	15	+	F								Dshi_2820	338	353	16	+	GCAACACTTTGTTAAC	T	Dshi_2820	338	353	16	+	GCAACACTTTGTTAAC	T
Dshi_2434	144	158	15	+	F								Dshi_2820	385	400	16	+	TAAATCGGAGGTGAAC	T	Dshi_2820	385	400	16	+	TAAATCGGAGGTGAAC	T
Dshi_2446	392	406	15	+	F								Dshi_2851	335	350	16	+	CTAGGAAATCCTTAAC	T	Dshi_2851	335	350	16	+	CTAGGAAATCCTTAAC	T
Dshi_2463	136	150	15	+	F								Dshi_2852	207	222	16	+	TTAATGTTTCGTTAAC	T	Dshi_2852	207	222	16	+	TTAATGTTTCGTTAAC	T
Dshi_2483	357	371	15	+	F								Dshi_2874	244	259	16	+	CTCAGAACTGGTTAAC	F	Dshi_2874	244	259	16	+	CTCAGAACTGGTTAAC	F
Dshi_2488	359	373	15	+	F								Dshi_3257	248	263	16	+	TGAAAGCGGCGTGAAC	T	Dshi_3257	248	263	16	+	TGAAAGCGGCGTGAAC	T
Dshi_2539	287	301	15	+	F								Dshi_3271	166	181	16	+	TCAACACGGTGTGAAC	F	Dshi_3271	166	181	16	+	TCAACACGGTGTGAAC	F
Dshi_2543	338	352	15	+	F								Dshi_3272	360	375	16	+	TCAACACGGTGTGAAC	F	Dshi_3272	360	375	16	+	TCAACACGGTGTGAAC	F
Dshi_2590	288	302	15	+	F								Dshi_3281	237	252	16	+	TGAAGATTTGGTTAAC	T	Dshi_3281	237	252	16	+	TGAAGATTTGGTTAAC	T
Dshi_2647	360	374	15	+	F								Dshi_3282	228	243	16	+	ATAGGGTTTTGTTAAC	F	Dshi_3282	228	243	16	+	ATAGGGTTTTGTTAAC	F
Dshi_2655	335	349	15	+	F								Dshi_3314	107	122	16	+	TTAAGAACGCGTAAAA	F	Dshi_3314	107	122	16	+	TTAAGAACGCGTAAAA	F
Dshi_2656	96	110	15	+	F								Dshi_3332	309	324	16	+	TTAAGCGGAGATTCAC	T	Dshi_3332	309	324	16	+	TTAAGCGGAGATTCAC	T
Dshi_2731	297	311	15	+	F								Dshi_3379	332	347	16	+	TTAGGGCAGCCTTAAC	T	Dshi_3379	332	347	16	+	TTAGGGCAGCCTTAAC	T
Dshi_2745	373	387	15	+	F								Dshi_3380	339	354	16	+	TTAGCAGGCCCTTAAG	T	Dshi_3380	339	354	16	+	TTAGCAGGCCCTTAAG	T
Dshi_2796	422	436	15	+	F								Dshi_3381	263	278	16	+	TTAAGGGCCTGCTAAC	F	Dshi_3381	263	278	16	+	TTAAGGGCCTGCTAAC	F
Dshi_2813	197	211	15	+	F								Dshi_3386	133	148	16	+	TTAGTGTTGTGTTAAC	F	Dshi_3386	133	148	16	+	TTAGTGTTGTGTTAAC	F
Dshi_2826	385	399	15	+	F								Dshi_3402	172	187	16	+	TTAAGCGGCCGGAAAC	T	Dshi_3402	172	187	16	+	TTAAGCGGCCGGAAAC	T
Dshi_2837	394	408	15	+	F								Dshi_3433	343	358	16	+	TTAAGCGGGTATTAAC	T	Dshi_3433	343	358	16	+	TTAAGCGGGTATTAAC	T
Dshi_2861	393	407	15	+	F								Dshi_3451	172	187	16	+	TTAATAATTATTTAAC	F	Dshi_3451	172	187	16	+	TTAATAATTATTTAAC	F
Dshi_2865	73	87	15	+	F								Dshi_3458	2	17	16	+	TTTGCTGACAGTTAAC	F	Dshi_3458	2	17	16	+	TTTGCTGACAGTTAAC	F
Dshi_2878	375	389	15	+	F								Dshi_3484	290	305	16	+	TTAACAGAGCGTGAAA	T	Dshi_3484	290	305	16	+	TTAACAGAGCGTGAAA	T
Dshi_2884	199	213	15	+	F								Dshi_3500	223	238	16	+	TAAAGCTCCTGTTAAC	T	Dshi_3500	223	238	16	+	TAAAGCTCCTGTTAAC	T
Dshi_3065	327	341	15	+	T								Dshi_3519	290	305	16	+	TGAACAGGGCGTTACC	F	Dshi_3519	290	305	16	+	TGAACAGGGCGTTACC	F
Dshi_3145	409	423	15	+	F								Dshi_3533	323	338	16	+	GTAAGTTTTAGTTGAC	F	Dshi_3533	323	338	16	+	GTAAGTTTTAGTTGAC	F
Dshi_3161	379	393	15	+	F								Dshi_3553	247	262	16	+	TTACCGTGAGGTTAAT	F	Dshi_3553	247	262	16	+	TTACCGTGAGGTTAAT	F
Dshi_3231	376	390	15	+	F								Dshi_3592	126	141	16	+	TTAACAAACCATTAAT	T	Dshi_3592	126	141	16	+	TTAACAAACCATTAAT	T
Dshi_3246	361	375	15	+	T								Dshi_0037	316	331	16	-	GTTAAGAAAAGCTTAA	T	Dshi_0037	316	331	16	-	GTTAAGAAAAGCTTAA	T
Dshi_3248	290	304	15	+	T								Dshi_0232	367	382	16	-	GTTAACACGACGTTAG	F	Dshi_0082	314	329	16	-	GGTAAGGATACCTTAA	T
Dshi_3263	380	394	15	+	T								Dshi_0237	237	252	16	-	GTTAATATTTCGTTAA	F	Dshi_0096	152	167	16	-	CTTAAACACCCCTTAA	F
Dshi_3277	364	378	15	+	F								Dshi_0337	247	262	16	-	GTTAACCAAACACAAA	F	Dshi_0157	333	348	16	-	GTAAACGCAGTACTGA	F
Dshi_3280	70	84	15	+	F								Dshi_0627	352	367	16	-	GTGAACGCGCTGGTAA	F	Dshi_0232	356	371	16	-	ATTAGCGCACTGTTAA	F
Dshi_3299	342	356	15	+	F								Dshi_0675	328	343	16	-	GTTAACGCCGGGGTAA	F	Dshi_0232	367	382	16	-	GTTAACACGACGTTAG	F
Dshi_3346	151	165	15	+	T								Dshi_0819	361	376	16	-	CTTAACCGGGCGTTAA	T	Dshi_0237	237	252	16	-	GTTAATATTTCGTTAA	F
Dshi_3350	250	264	15	+	F								Dshi_0837	302	317	16	-	CTTAACGGCCGGTGAA	F	Dshi_0264	302	317	16	-	GTTTACGCGCGCCTAT	T
Dshi_3397	190	204	15	+	F								Dshi_0840	253	268	16	-	GTTAACCCATATTTTA	T	Dshi_0325	47	62	16	-	GTTCACGAAATCCGAA	F
Dshi_3407	7	21	15	+	F								Dshi_0841	98	113	16	-	GTTAACGGTGGTGTCA	F	Dshi_0337	247	262	16	-	GTTAACCAAACACAAA	F
Dshi_3429	127	141	15	+	F								Dshi_0854	341	356	16	-	GTTAACATTTCGGTAA	T	Dshi_0411	414	429	16	-	GTCAACGGTTTCTGAA	F
Dshi_3541	256	270	15	+	F								Dshi_1204	103	118	16	-	CTTAACATTACGTTAA	F	Dshi_0431	324	339	16	-	GTTAACGCGGGTTAAT	F
Dshi_3554	369	383	15	+	F								Dshi_1205	340	355	16	-	GTTAACGTAATGTTAA	T	Dshi_0612	291	306	16	-	GTAAACGACACGTTAG	F
Dshi_3566	353	367	15	+	F								Dshi_1505	346	361	16	-	ATTAACAATTGATTAA	T	Dshi_0627	352	367	16	-	GTGAACGCGCTGGTAA	F
Dshi_0008	16	30	15	-	F								Dshi_1508	328	343	16	-	GGTAACTCGCAATTAA	T	Dshi_0675	328	343	16	-	GTTAACGCCGGGGTAA	F
Dshi_0041	269	283	15	-	F								Dshi_1512	57	72	16	-	GTTGACGGCCTATGAA	F	Dshi_0750	310	325	16	-	GTTAAGACAATCTTTA	T
Dshi_0050	6	20	15	-	F								Dshi_1527	254	269	16	-	GTTAACCATCGGTGAT	T	Dshi_0819	361	376	16	-	CTTAACCGGGCGTTAA	T
Dshi_0050	171	185	15	-	F								Dshi_1560	365	380	16	-	GTTAACCTTGTGGTTA	F	Dshi_0837	302	317	16	-	CTTAACGGCCGGTGAA	F
Dshi_0051	419	433	15	-	F								Dshi_1585	251	266	16	-	GTTACTGGAATCTTAA	T	Dshi_0840	253	268	16	-	GTTAACCCATATTTTA	T
Dshi_0070	309	323	15	-	F								Dshi_1644	340	355	16	-	GTTAAGCGTAGCTTAA	T	Dshi_0841	98	113	16	-	GTTAACGGTGGTGTCA	F
Dshi_0113	320	334	15	-	F								Dshi_1661	163	178	16	-	GTTAAGGATAGTCTAA	F	Dshi_0854	341	356	16	-	GTTAACATTTCGGTAA	T
Dshi_0123	259	273	15	-	F								Dshi_1749	80	95	16	-	TTTAACGACATGTTAC	F	Dshi_0872	47	62	16	-	GTTAACCTTTGTTTCC	F
Dshi_0143	337	351	15	-	F								Dshi_1788	271	286	16	-	GTTAACAAACCATTAA	F	Dshi_0873	366	381	16	-	ATTAAAGAAGTGTTAA	T
Dshi_0234	335	349	15	-	T								Dshi_1922	192	207	16	-	GTAAACAGTTTGTTAA	F	Dshi_0945	231	246	16	-	GTTAACGCCGTCCAAT	F
Dshi_0268	190	204	15	-	F								Dshi_1923	324	339	16	-	GTTAACAAACTGTTTA	T	Dshi_1035	11	26	16	-	GTTAACCTATTCGGAA	F
Dshi_0302	333	347	15	-	F								Dshi_1926	353	368	16	-	GTTACCGCTCTCATAA	F	Dshi_1157	274	289	16	-	GCTAACGCGCTCTTCA	F
Dshi_0343	320	334	15	-	T								Dshi_1995	304	319	16	-	GTTAACAAAACATTAA	T	Dshi_1183	326	341	16	-	GCTAACGTTTTCTTAG	F
Dshi_0416	189	203	15	-	F								Dshi_2094	387	402	16	-	GTTAACGCAACCTGAT	F	Dshi_1204	103	118	16	-	CTTAACATTACGTTAA	F
Dshi_0470	81	95	15	-	F								Dshi_2193	286	301	16	-	GTTAACGGGGCGTGAC	F	Dshi_1205	340	355	16	-	GTTAACGTAATGTTAA	T
Dshi_0497	33	47	15	-	F								Dshi_2287	308	323	16	-	GTTAACGGCGAGCGAA	F	Dshi_1319	156	171	16	-	GTGAACGAGGGGCTGA	F
Dshi_0591	150	164	15	-	F								Dshi_2388	337	352	16	-	CTTAACTTGATGTTAA	T	Dshi_1389	207	222	16	-	GTCAACAAGATGTTAT	F
Dshi_0630	337	351	15	-	F								Dshi_2401	240	255	16	-	GTTAACGCGCCCTGAA	F	Dshi_1505	346	361	16	-	ATTAACAATTGATTAA	T
Dshi_0661	93	107	15	-	F								Dshi_2416	348	363	16	-	GTTAACGCGCCCTTAA	F	Dshi_1507	336	351	16	-	CTTCACTTCCTCTTAA	T
Dshi_0729	5	19	15	-	F								Dshi_2467	229	244	16	-	GTTTACGTTAGGGTAA	F	Dshi_1508	328	343	16	-	GGTAACTCGCAATTAA	T
Dshi_0841	370	384	15	-	F								Dshi_2469	384	399	16	-	GTTAAGGATTTCTGAA	F	Dshi_1512	57	72	16	-	GTTGACGGCCTATGAA	F
Dshi_1005	434	448	15	-	F								Dshi_2515	3	18	16	-	GTCAACGGTCTGTGAA	F	Dshi_1519	41	56	16	-	GTTTACGAGCTGTTCC	F
Dshi_1046	279	293	15	-	F								Dshi_2538	318	333	16	-	GTTAATCTAGGATTGA	F	Dshi_1527	254	269	16	-	GTTAACCATCGGTGAT	F
Dshi_1101	367	381	15	-	F								Dshi_2539	310	325	16	-	ATTAACGCTCTTTTAT	F	Dshi_1560	365	380	16	-	GTTAACCTTGTGGTTA	F
Dshi_1103	351	365	15	-	F								Dshi_2609	203	218	16	-	GTTAATTTTCGCTTAA	F	Dshi_1585	251	266	16	-	GTTACTGGAATCTTAA	T
Dshi_1126	392	406	15	-	T								Dshi_2646	224	239	16	-	GTTAAGCAGCTGTTAA	F	Dshi_1644	340	355	16	-	GTTAAGCGTAGCTTAA	T
Dshi_1188	263	277	15	-	F								Dshi_2647	278	293	16	-	GTTAACAGCTGCTTAA	F	Dshi_1661	163	178	16	-	GTTAAGGATAGTCTAA	F
Dshi_1193	97	111	15	-	F								Dshi_2655	225	240	16	-	GTAAACGCTGTGTTGA	F	Dshi_1749	80	95	16	-	TTTAACGACATGTTAC	F
Dshi_1208	236	250	15	-	F								Dshi_2663	248	263	16	-	GTTAACGGTCGGGTGC	F	Dshi_1758	46	61	16	-	GTTCACGCCGCATTTA	F
Dshi_1220	174	188	15	-	F								Dshi_2819	364	379	16	-	GTTAACAAAGTGTTGC	F	Dshi_1766	310	325	16	-	GTAAACGGCTGGATAA	F
Dshi_1223	212	226	15	-	F								Dshi_2828	371	386	16	-	GTTAACGGAACCTGAA	T	Dshi_1785	127	142	16	-	GTTAATCCACCGTCAA	F
Dshi_1336	303	317	15	-	F								Dshi_2852	206	221	16	-	GTTAATGTTTCGTTAA	T	Dshi_1786	46	61	16	-	ATTAACGCATTCTTCA	F
Dshi_1347	207	221	15	-	F								Dshi_3281	247	262	16	-	GTTAACAAAACCCTAT	T	Dshi_1788	271	286	16	-	GTTAACAAACCATTAA	F
Dshi_1364	353	367	15	-	T								Dshi_3282	238	253	16	-	GTTAACCAAATCTTCA	F	Dshi_1804	331	346	16	-	GTTAACCAATTGGCAA	T
Dshi_1404	322	336	15	-	F								Dshi_3380	338	353	16	-	GTTAGCAGGCCCTTAA	T	Dshi_1857	169	184	16	-	GTCAACGAGACCCTGA	F
Dshi_1477	169	183	15	-	F								Dshi_3386	132	147	16	-	GTTAGTGTTGTGTTAA	F	Dshi_1919	407	422	16	-	GTTAACTCGCAGTTCC	F
Dshi_1519	41	55	15	-	F								Dshi_3452	232	247	16	-	GTTAAATAATTATTAA	F	Dshi_1922	192	207	16	-	GTAAACAGTTTGTTAA	F
Dshi_1547	93	107	15	-	F								Dshi_3592	125	140	16	-	CTTAACAAACCATTAA	T	Dshi_1923	324	339	16	-	GTTAACAAACTGTTTA	T
Dshi_1560	192	206	15	-	F															Dshi_1926	353	368	16	-	GTTACCGCTCTCATAA	F
Dshi_1597	162	176	15	-	F															Dshi_1963	221	236	16	-	GCTAACGTTGCGGTAA	F
Dshi_1600	255	269	15	-	F															Dshi_1995	304	319	16	-	GTTAACAAAACATTAA	T
Dshi_1628	255	269	15	-	F															Dshi_2088	305	320	16	-	GTTAACGCGCCCCTTT	F
Dshi_1643	51	65	15	-	T															Dshi_2094	387	402	16	-	GTTAACGCAACCTGAT	F
Dshi_1643	312	326	15	-	T															Dshi_2144	296	311	16	-	GTTATCGCTAACATAA	F
Dshi_1659	50	64	15	-	F															Dshi_2193	286	301	16	-	GTTAACGGGGCGTGAC	F
Dshi_1770	282	296	15	-	F															Dshi_2210	254	269	16	-	GTTTCCGAGGCGTTAA	T
Dshi_1785	64	78	15	-	F															Dshi_2256	42	57	16	-	GTTCACCACCTATGAA	F
Dshi_1809	319	333	15	-	F															Dshi_2287	308	323	16	-	GTTAACGGCGAGCGAA	F
Dshi_1883	158	172	15	-	F															Dshi_2343	342	357	16	-	GTTAACGATCCGCCCA	F
Dshi_2033	149	163	15	-	F															Dshi_2348	334	349	16	-	GTTAGCGCCCCTTTAC	F
Dshi_2034	299	313	15	-	F															Dshi_2388	337	352	16	-	CTTAACTTGATGTTAA	T
Dshi_2094	351	365	15	-	F															Dshi_2401	240	255	16	-	GTTAACGCGCCCTGAA	F
Dshi_2099	89	103	15	-	F															Dshi_2416	348	363	16	-	GTTAACGCGCCCTTAA	F
Dshi_2167	41	55	15	-	T															Dshi_2467	229	244	16	-	GTTTACGTTAGGGTAA	F
Dshi_2168	240	254	15	-	T															Dshi_2468	290	305	16	-	GTAAACCTTTTTTTGA	F
Dshi_2196	144	158	15	-	F															Dshi_2469	384	399	16	-	GTTAAGGATTTCTGAA	F
Dshi_2200	74	88	15	-	F															Dshi_2475	41	56	16	-	CTTAACGCATCTTTAC	F
Dshi_2234	306	320	15	-	F															Dshi_2515	3	18	16	-	GTCAACGGTCTGTGAA	F
Dshi_2244	375	389	15	-	F															Dshi_2538	318	333	16	-	GTTAATCTAGGATTGA	F
Dshi_2259	156	170	15	-	F															Dshi_2539	310	325	16	-	ATTAACGCTCTTTTAT	F
Dshi_2266	295	309	15	-	F															Dshi_2609	203	218	16	-	GTTAATTTTCGCTTAA	F
Dshi_2288	60	74	15	-	F															Dshi_2646	224	239	16	-	GTTAAGCAGCTGTTAA	F
Dshi_2305	322	336	15	-	F															Dshi_2647	278	293	16	-	GTTAACAGCTGCTTAA	F
Dshi_2341	269	283	15	-	F															Dshi_2655	225	240	16	-	GTAAACGCTGTGTTGA	F
Dshi_2447	323	337	15	-	F															Dshi_2663	248	263	16	-	GTTAACGGTCGGGTGC	F
Dshi_2484	340	354	15	-	F															Dshi_2739	375	390	16	-	GTTAAGGAACTCCAAA	F
Dshi_2489	291	305	15	-	F															Dshi_2806	406	421	16	-	GTTCACGCGACGTGAA	F
Dshi_2517	16	30	15	-	F															Dshi_2819	317	332	16	-	GTTCACCTCCGATTTA	F
Dshi_2528	106	120	15	-	F															Dshi_2819	364	379	16	-	GTTAACAAAGTGTTGC	F
Dshi_2538	332	346	15	-	F															Dshi_2828	371	386	16	-	GTTAACGGAACCTGAA	T
Dshi_2599	414	428	15	-	F															Dshi_2852	206	221	16	-	GTTAATGTTTCGTTAA	T
Dshi_2626	422	436	15	-	F															Dshi_2875	236	251	16	-	GTTAACCAGTTCTGAG	F
Dshi_2646	144	158	15	-	F															Dshi_3064	164	179	16	-	GTTGACGGCCTGTTTC	F
Dshi_2655	435	449	15	-	F															Dshi_3068	380	395	16	-	GTTAAGGTATACTTAT	F
Dshi_2656	196	210	15	-	F															Dshi_3273	141	156	16	-	GTTCACACCGTGTTGA	F
Dshi_2671	134	148	15	-	F															Dshi_3281	247	262	16	-	GTTAACAAAACCCTAT	T
Dshi_2732	419	433	15	-	F															Dshi_3282	238	253	16	-	GTTAACCAAATCTTCA	F
Dshi_2794	45	59	15	-	F															Dshi_3315	293	308	16	-	TTTTACGCGTTCTTAA	T
Dshi_2797	240	254	15	-	F															Dshi_3380	338	353	16	-	GTTAGCAGGCCCTTAA	T
Dshi_2813	351	365	15	-	F															Dshi_3381	262	277	16	-	CTTAAGGGCCTGCTAA	F
Dshi_2852	201	215	15	-	T															Dshi_3386	132	147	16	-	GTTAGTGTTGTGTTAA	F
Dshi_2995	8	22	15	-	F															Dshi_3452	232	247	16	-	GTTAAATAATTATTAA	F
Dshi_3029	167	181	15	-	F															Dshi_3458	12	27	16	-	GTTAACGCGATGGTGG	F
Dshi_3035	158	172	15	-	F															Dshi_3485	341	356	16	-	TTTCACGCTCTGTTAA	T
Dshi_3064	349	363	15	-	F															Dshi_3500	222	237	16	-	GTAAAGCTCCTGTTAA	T
Dshi_3144	297	311	15	-	F															Dshi_3532	206	221	16	-	GTCAACTAAAACTTAC	F
Dshi_3246	16	30	15	-	T															Dshi_3592	125	140	16	-	CTTAACAAACCATTAA	T
Dshi_3247	332	346	15	-	T
Dshi_3264	293	307	15	-	T
Dshi_3268	137	151	15	-	F
Dshi_3288	316	330	15	-	F
Dshi_3329	104	118	15	-	F
Dshi_3390	308	322	15	-	F
Dshi_3410	431	445	15	-	F
Dshi_3414	293	307	15	-	F
Dshi_3428	421	435	15	-	F
Dshi_3525	32	46	15	-	F
Dshi_3567	207	221	15	-	F
